# Supplementary material for: Bivariate genome-wide association analyses of the broad depression phenotype combined with major depressive disorder, bipolar disorder or schizophrenia reveal eight novel genetic loci for depression
Source: PubMed Central journal article supplement (PMC7303007; doi:10.1038/s41380-018-0336-6), 2019-01-09
Supplement: 41380_2018_336_MOESM1_ESM.pdf [file 41380_2018_336_MOESM1_ESM.pdf]

# Depression\_SCZ2014\_rs7597593

Plotted SNPs

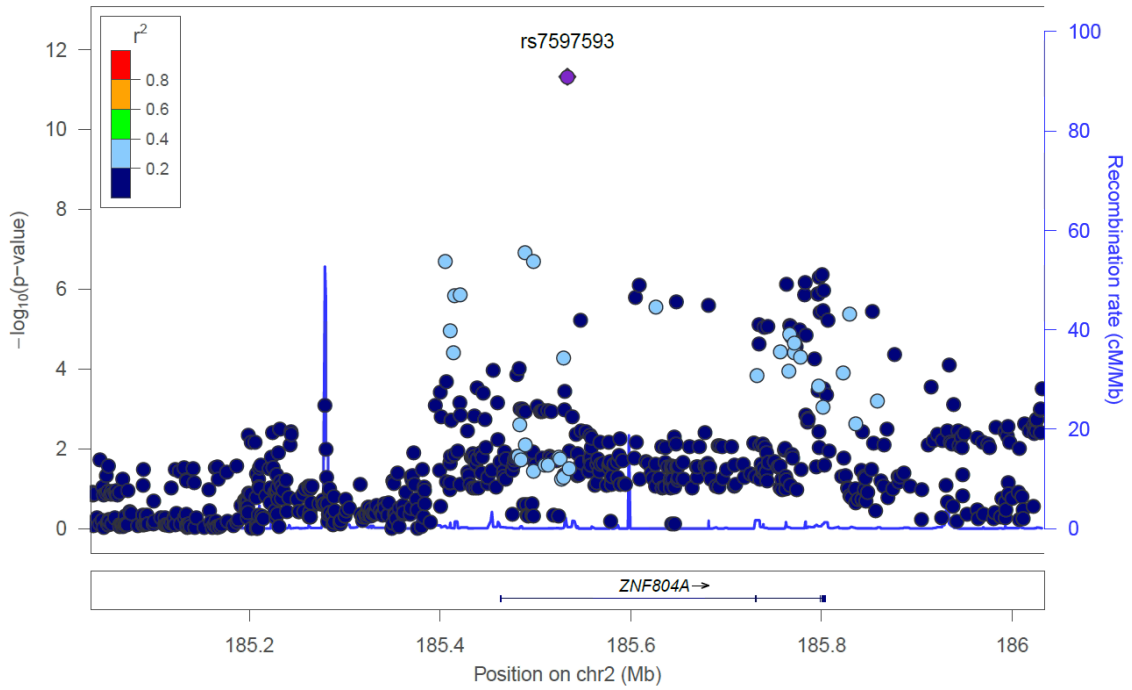

# MDD23andme\_depression\_joint\_analysis\_rs9368649

Plotted SNPs

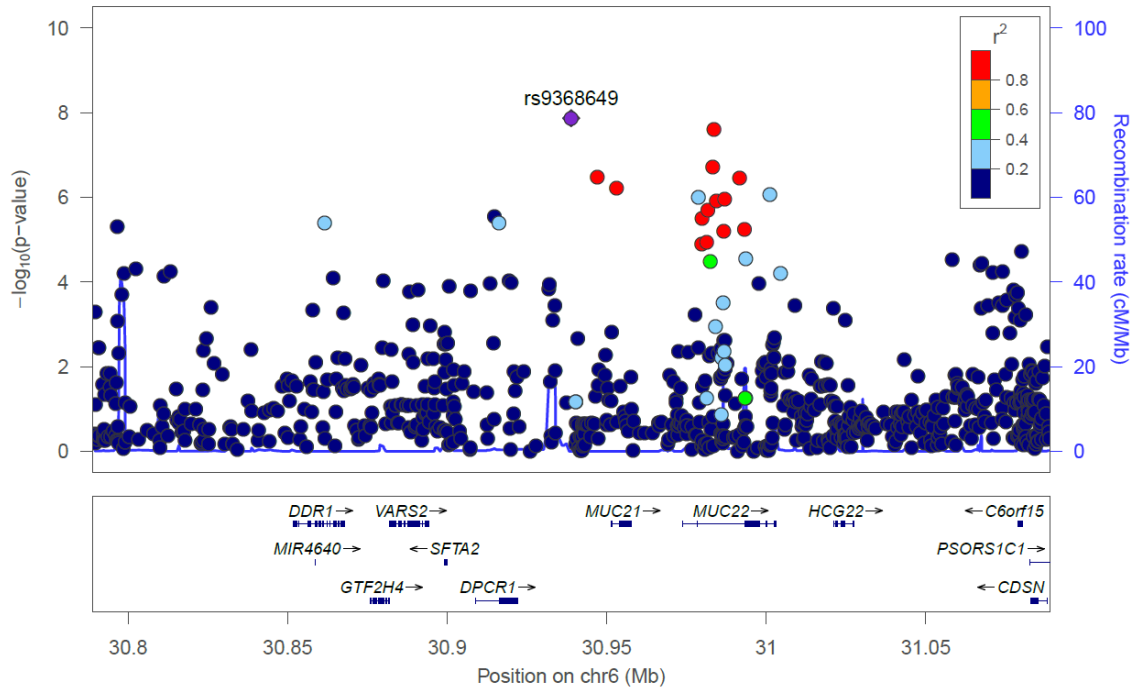



## Depression\_SCZ2014\_rs389883

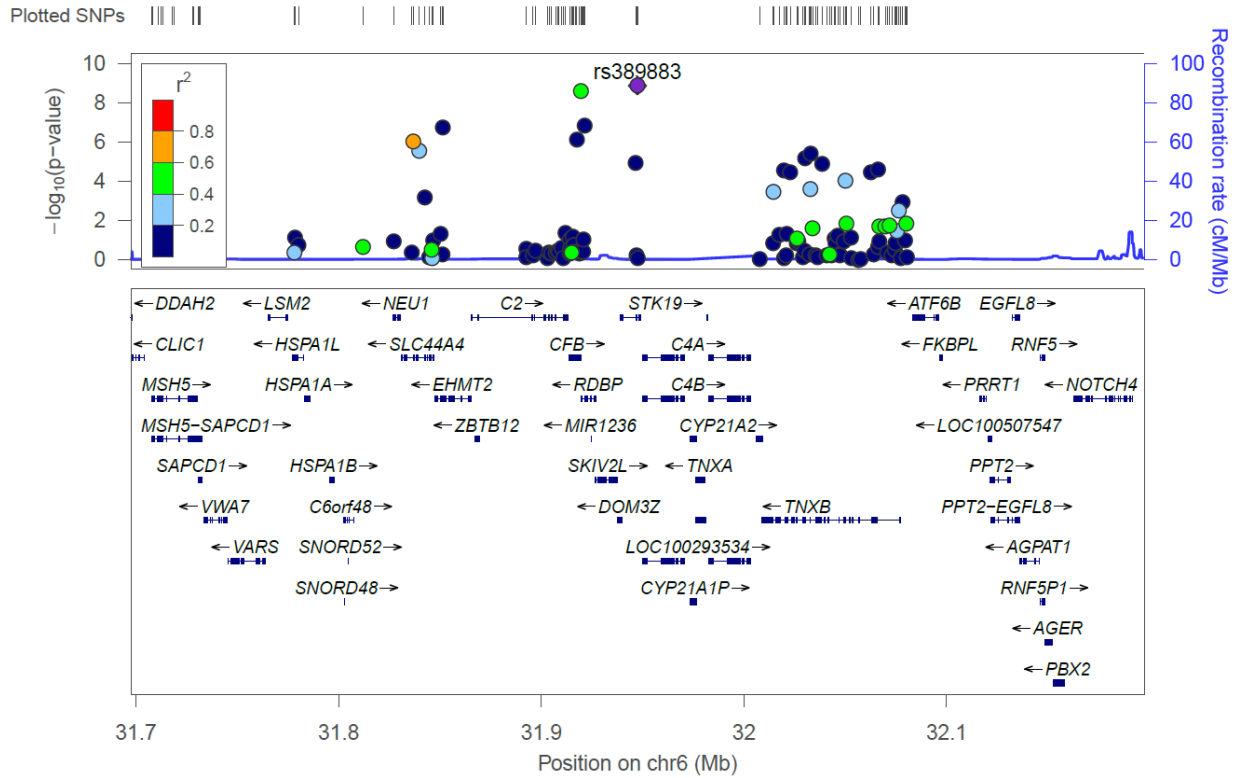

## Depression\_SCZ2014\_rs2026194

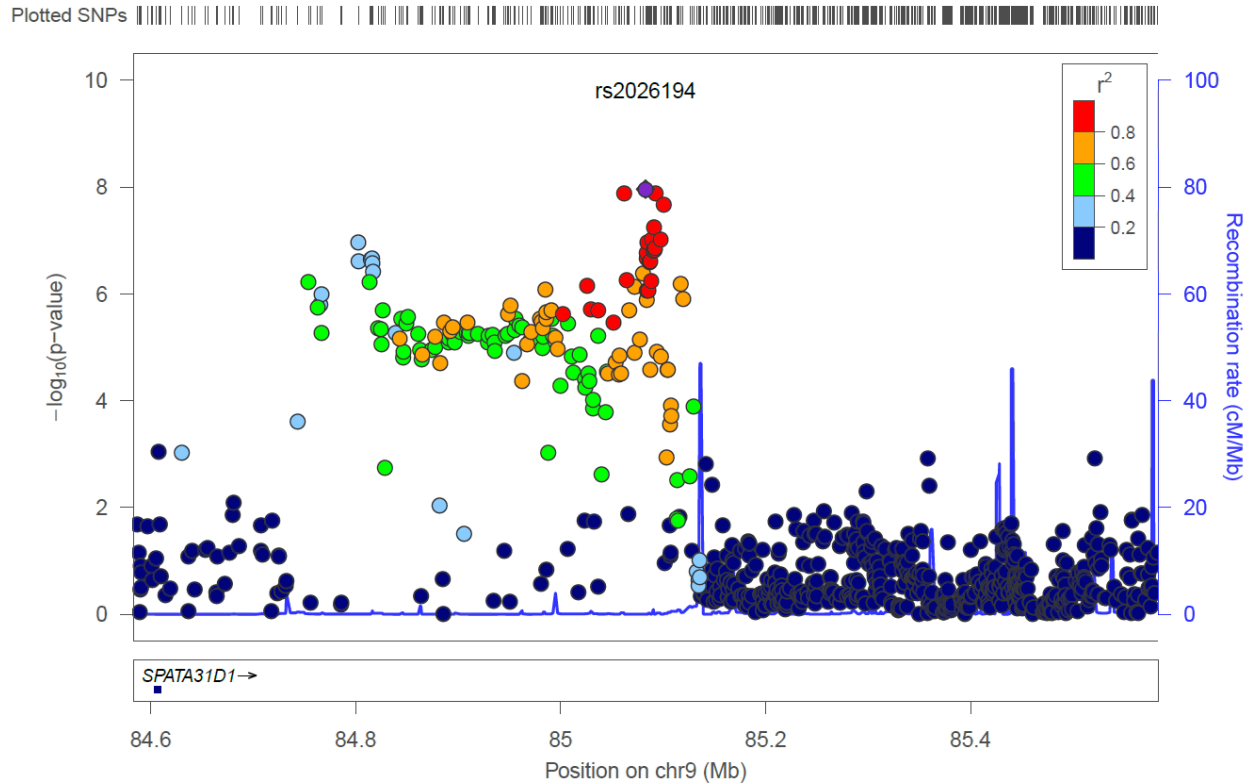

# Depression\_SCZ2014\_rs2182139

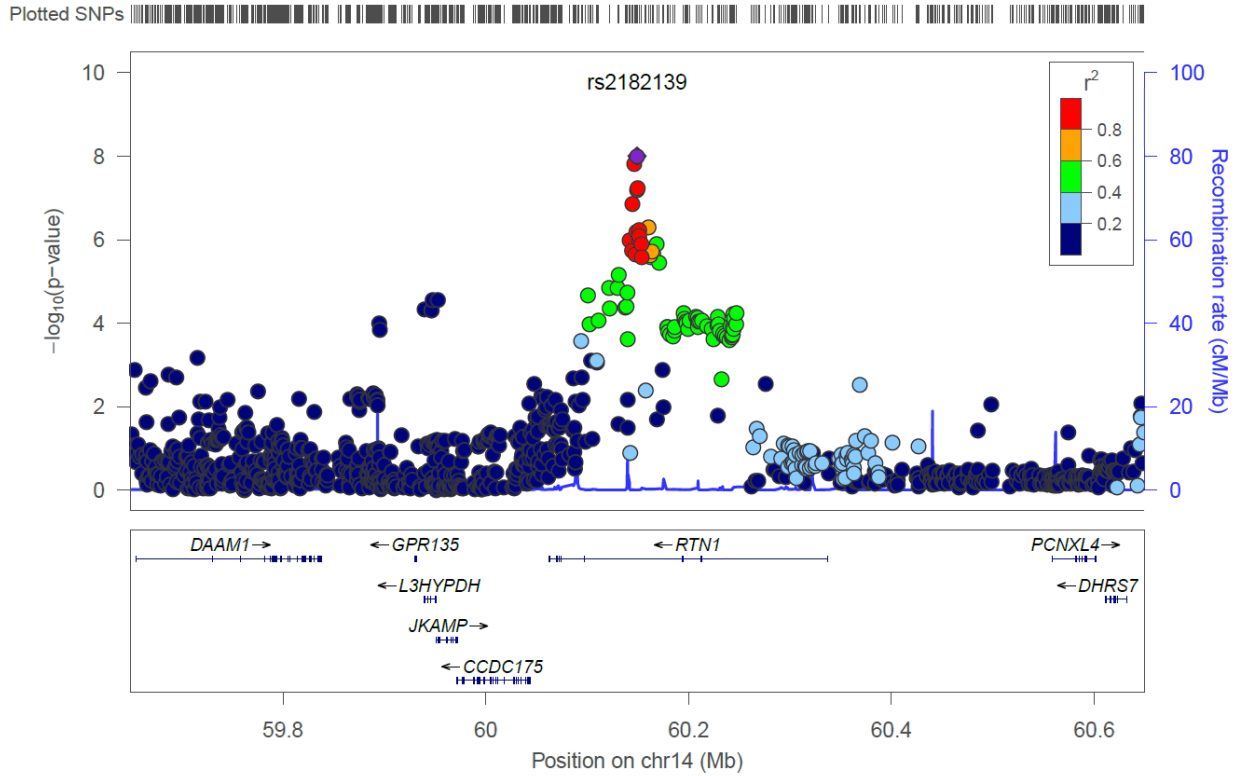

# Depression\_SCZ2014\_rs9951150

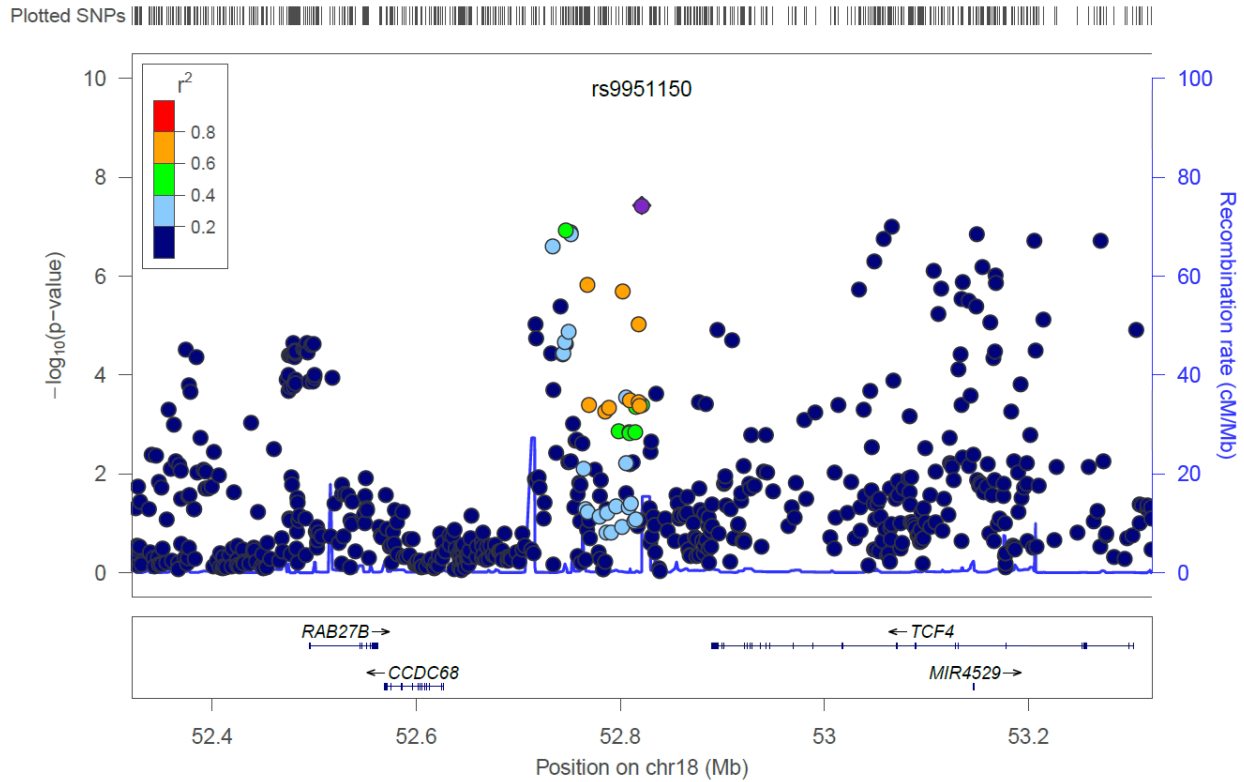

**Supplementary Figure 1: Regional association plots of the eight genetic loci novel for depression from the 13 replicated gSNPs**

NOTE: The lead SNP and the psychiatric traits are indicated in the top line. In the plots rs-numbers of the lead SNPs are given. Color coding reflects the LD ( $r^2$ ) of the SNP with this lead SNP according to the legend. The left y-axis represents  $-\log_{10}(\text{p-value})$  of association; the right y-axis indicates recombination rate. The x-axis depicts the position on the chromosome (Mb) and lists known genes near the locus.

Abbreviations: SCZ2014: Schizophrenia 2014 GWAS study, MDD23andme: self-reported MDD from 23andme GWAS study.

**a)**

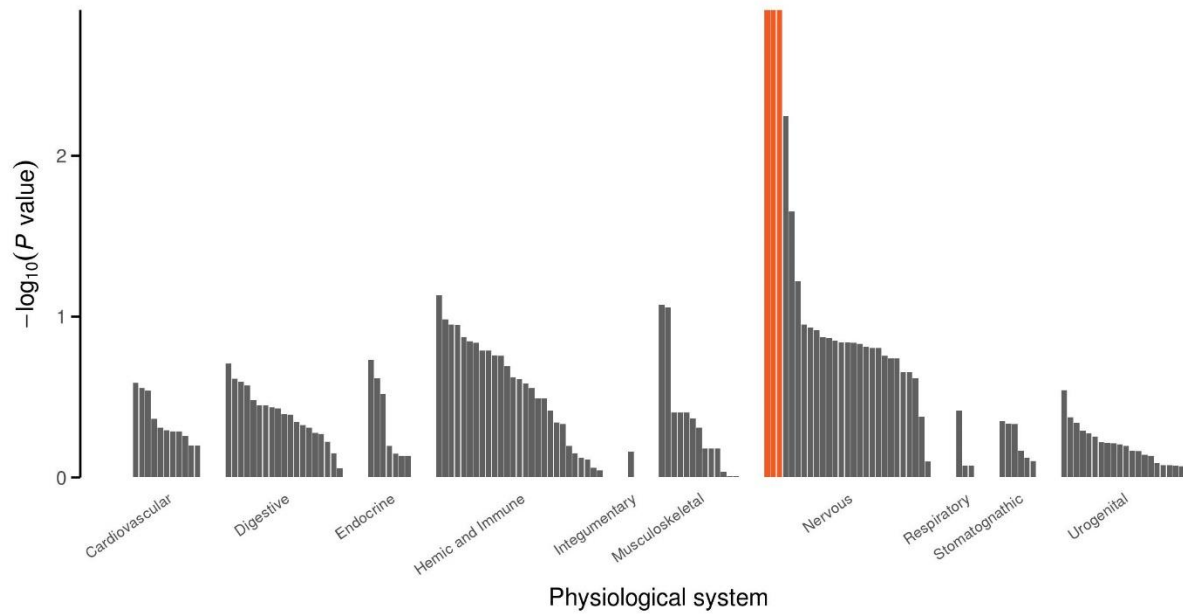

**b)**

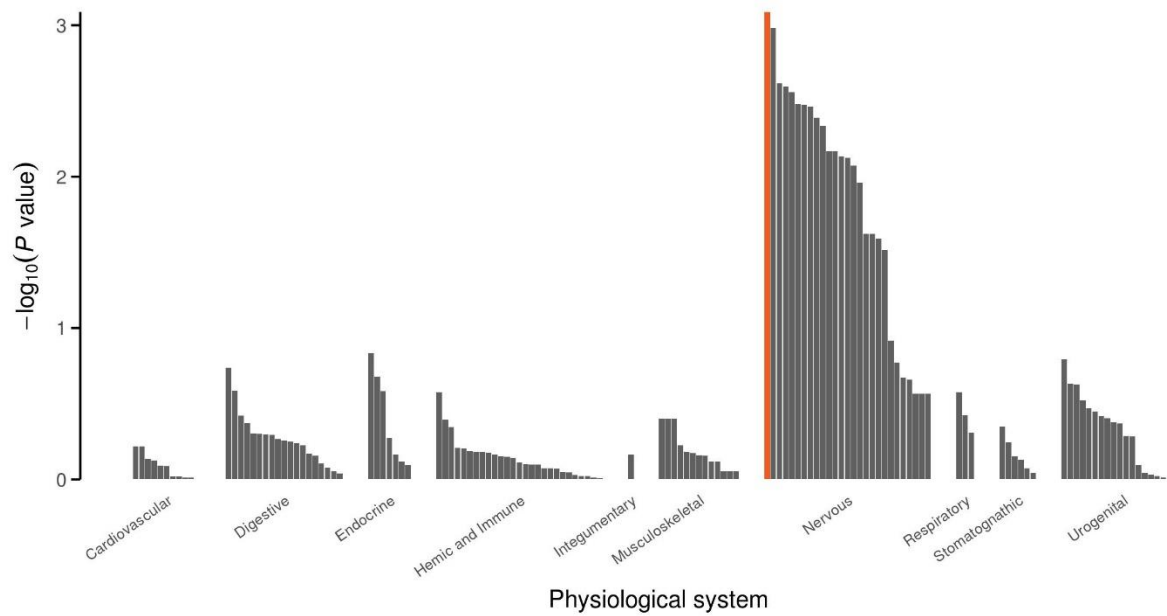

**Supplementary Figure 2:** DEPICT results of tissue/cell type enrichment analysis using bivariate GWAS analyses of the broad depression phenotype with **a)** schizophrenia, and; **b)** self-reported MDD. The red bars are significant (FDR<0.05).
