# Supplementary material for: Bivariate genome-wide association analyses of the broad depression phenotype combined with major depressive disorder, bipolar disorder or schizophrenia reveal eight novel genetic loci for depression
Source: PubMed Central journal article supplement (PMC7303007; doi:10.1038/s41380-018-0336-6), 2019-01-09
Supplement: 41380_2018_336_MOESM3_ESM.pdf [file 41380_2018_336_MOESM3_ESM.pdf]

**Supplementary Table 1:** Replication results in the UK Biobank for all three-depression outcomes (broad depression, probable MDD and ICD-coded MDD)<sup>1</sup> for the 22 genome-wide significant SNPs from bivariate discovery meta-analyses.

| gSNP                   | A1 | A2 | Chr | Position/<br>Ch37/hg19 | EAF  | Imputation<br>accuracy | Broad depression      |        |                             | Probable MDD           |        |                             | ICD-coded MDD           |                        |                             |
|------------------------|----|----|-----|------------------------|------|------------------------|-----------------------|--------|-----------------------------|------------------------|--------|-----------------------------|-------------------------|------------------------|-----------------------------|
|                        |    |    |     |                        |      |                        | Beta                  | SE     | P-value<br>(2-sided)        | Beta                   | SE     | P-value<br>(2-sided)        | Beta                    | SE                     | P-value<br>(2-sided)        |
| rs12407717             | T  | C  | 1   | 30426014               | 0.13 | 0.998                  | -0.0016               | 0.0018 | 3.64x10 <sup>-1</sup>       | -0.0022                | 0.0019 | 2.47x10 <sup>-1</sup>       | -7.29 x10 <sup>-4</sup> | 8.71 x10 <sup>-4</sup> | 4.03x10 <sup>-1</sup>       |
| rs12128108             | T  | C  | 1   | 50293421               | 0.23 | 1.000                  | 0.0021                | 0.0014 | 1.33x10 <sup>-1</sup>       | 0.0010                 | 0.0015 | 5.07x10 <sup>-1</sup>       | 5.37 x10 <sup>-4</sup>  | 6.91 x10 <sup>-4</sup> | 4.37x10 <sup>-1</sup>       |
| rs2422320              | T  | C  | 1   | 73293332               | 0.43 | 0.997                  | -0.0048               | 0.0012 | <b>7.32x10<sup>-5</sup></b> | -0.0028                | 0.0013 | <b>3.11x10<sup>-2</sup></b> | -0.0010                 | 5.92 x10 <sup>-4</sup> | 8.81x10 <sup>-2</sup>       |
| rs2318763              | A  | G  | 1   | 150115974              | 0.17 | 0.999                  | 0.0015                | 0.0016 | 3.37x10 <sup>-1</sup>       | 0.0027                 | 0.0017 | 1.10x10 <sup>-1</sup>       | 0.0010                  | 7.77 x10 <sup>-4</sup> | 1.91x10 <sup>-1</sup>       |
| rs16836940             | A  | G  | 1   | 150416913              | 0.22 | 1.000                  | 7.64x10 <sup>-4</sup> | 0.0014 | 5.91x10 <sup>-1</sup>       | 4.66x10 <sup>-4</sup>  | 0.0016 | 7.64x10 <sup>-1</sup>       | 1.22 x10 <sup>-4</sup>  | 7.01 x10 <sup>-4</sup> | 8.62x10 <sup>-1</sup>       |
| rs7597593              | T  | C  | 2   | 185533580              | 0.62 | 0.998                  | 0.0025                | 0.0012 | <b>4.28x10<sup>-2</sup></b> | 0.0024                 | 0.0013 | 7.05x10 <sup>-2</sup>       | 0.0013                  | 6.00 x10 <sup>-4</sup> | <b>2.58x10<sup>-2</sup></b> |
| rs2535629              | A  | G  | 3   | 52833219               | 0.33 | 1.000                  | -0.0031               | 0.0013 | <b>1.32x10<sup>-2</sup></b> | -0.0008                | 0.0014 | 5.79x10 <sup>-1</sup>       | -7.23 x10 <sup>-4</sup> | 6.18 x10 <sup>-4</sup> | 2.43x10 <sup>-1</sup>       |
| rs1966136              | A  | C  | 3   | 61153578               | 0.41 | 1.000                  | -0.0039               | 0.0012 | <b>1.29x10<sup>-3</sup></b> | -0.0004                | 0.0013 | 7.87x10 <sup>-1</sup>       | -4.47 x10 <sup>-4</sup> | 5.91 x10 <sup>-4</sup> | 4.49x10 <sup>-1</sup>       |
| rs7714851              | T  | C  | 5   | 164475774              | 0.52 | 1.000                  | -0.0057               | 0.0012 | <b>1.07x10<sup>-6</sup></b> | -0.0021                | 0.0013 | 1.03x10 <sup>-1</sup>       | -0.0014                 | 5.82 x10 <sup>-4</sup> | <b>1.31x10<sup>-2</sup></b> |
| rs911186               | A  | G  | 6   | 27150599               | 0.23 | 1.000                  | 0.0040                | 0.0014 | <b>3.99x10<sup>-3</sup></b> | 0.0019                 | 0.0015 | 2.18x10 <sup>-1</sup>       | 7.56 x10 <sup>-4</sup>  | 6.92 x10 <sup>-4</sup> | 2.75x10 <sup>-1</sup>       |
| rs2894052 <sup>A</sup> | C  | G  | 6   | 30938128               | 0.14 | 0.999                  | 0.0044                | 0.0017 | <b>9.50x10<sup>-3</sup></b> | 0.0029                 | 0.0019 | 1.18x10 <sup>-1</sup>       | 0.0019                  | 0.0008                 | <b>2.48x10<sup>-2</sup></b> |
| rs1265099              | A  | G  | 6   | 31105413               | 0.41 | 1.000                  | 0.0030                | 0.0012 | <b>1.38x10<sup>-2</sup></b> | 8.06x10 <sup>-4</sup>  | 0.0013 | 5.40x10 <sup>-1</sup>       | 5.21 x10 <sup>-4</sup>  | 5.93 x10 <sup>-4</sup> | 3.79x10 <sup>-1</sup>       |
| rs389883               | T  | G  | 6   | 31947460               | 0.68 | 1.000                  | 0.0051                | 0.0013 | <b>4.73x10<sup>-5</sup></b> | 0.0026                 | 0.0014 | 5.91x10 <sup>-2</sup>       | 0.0016                  | 6.23 x10 <sup>-4</sup> | <b>1.00x10<sup>-2</sup></b> |
| rs4976976              | A  | G  | 8   | 143311653              | 0.40 | 0.999                  | -0.0016               | 0.0012 | 1.85x10 <sup>-1</sup>       | -0.0016                | 0.0013 | 2.31x10 <sup>-1</sup>       | -6.31 x10 <sup>-4</sup> | 5.94 x10 <sup>-4</sup> | 2.88x10 <sup>-1</sup>       |
| rs2026194              | T  | C  | 9   | 85082899               | 0.24 | 1.000                  | 0.0037                | 0.0014 | <b>7.24x10<sup>-3</sup></b> | 0.0029                 | 0.0015 | 5.46x10 <sup>-2</sup>       | 1.89 x10 <sup>-4</sup>  | 6.76 x10 <sup>-4</sup> | 7.80x10 <sup>-1</sup>       |
| rs4765914              | T  | C  | 12  | 2420377                | 0.79 | 0.997                  | 0.0025                | 0.0014 | 8.48x10 <sup>-2</sup>       | 0.0012                 | 0.0016 | 4.35x10 <sup>-1</sup>       | -2.94 x10 <sup>-4</sup> | 7.16 x10 <sup>-4</sup> | 6.82x10 <sup>-1</sup>       |
| rs10774037             | A  | G  | 12  | 2420526                | 0.79 | 0.997                  | -0.0025               | 0.0015 | 8.95x10 <sup>-2</sup>       | -0.0014                | 0.0016 | 3.91x10 <sup>-1</sup>       | 2.80 x10 <sup>-4</sup>  | 7.17 x10 <sup>-4</sup> | 6.96x10 <sup>-1</sup>       |
| rs2182139              | T  | C  | 14  | 60149233               | 0.75 | 1.000                  | 0.0040                | 0.0014 | <b>3.71x10<sup>-3</sup></b> | 0.0010                 | 0.0015 | 4.94x10 <sup>-1</sup>       | 4.88 x10 <sup>-4</sup>  | 6.74 x10 <sup>-4</sup> | 4.70x10 <sup>-1</sup>       |
| rs9323497              | T  | C  | 14  | 67873128               | 0.05 | 0.998                  | 5.96x10 <sup>-4</sup> | 0.0027 | 8.24x10 <sup>-1</sup>       | -0.0014                | 0.0029 | 6.30x10 <sup>-1</sup>       | -0.0016                 | 0.0013                 | 2.21x10 <sup>-1</sup>       |
| rs4906335              | A  | C  | 14  | 104021141              | 0.28 | 0.998                  | 0.0042                | 0.0013 | <b>1.45x10<sup>-3</sup></b> | 0.0033                 | 0.0014 | <b>2.18x10<sup>-2</sup></b> | -5.96 x10 <sup>-5</sup> | 6.51 x10 <sup>-4</sup> | 9.27x10 <sup>-1</sup>       |
| rs4843613              | T  | C  | 16  | 87489698               | 0.83 | 0.999                  | 0.0026                | 0.0016 | 8.96x10 <sup>-2</sup>       | -0.0011                | 0.0017 | 5.25x10 <sup>-1</sup>       | -4.91 x10 <sup>-4</sup> | 7.68 x10 <sup>-4</sup> | 5.22x10 <sup>-1</sup>       |
| rs9951150              | A  | G  | 18  | 52821124               | 0.46 | 0.999                  | -0.0031               | 0.0012 | <b>9.27x10<sup>-3</sup></b> | -5.46x10 <sup>-4</sup> | 0.0013 | 6.74x10 <sup>-1</sup>       | -3.77 x10 <sup>-4</sup> | 5.85 x10 <sup>-4</sup> | 5.19x10 <sup>-1</sup>       |

**Abbreviations:** A1, effect allele; A2, other allele; EAF, effect allele frequency

Replication p-values < 0.05 are **bolded**. Beta effect sizes and standard errors are reported on the 0-1 scale

<sup>A</sup> Proxy for rs9368649 with r<sup>2</sup>=1
