# Supplementary material for: Bivariate genome-wide association analyses of the broad depression phenotype combined with major depressive disorder, bipolar disorder or schizophrenia reveal eight novel genetic loci for depression
Source: PubMed Central journal article supplement (PMC7303007; doi:10.1038/s41380-018-0336-6), 2019-01-09
Supplement: 41380_2018_336_MOESM4_ESM.pdf [file 41380_2018_336_MOESM4_ESM.pdf]

**Supplementary Table 2:** Table showing genetic correlation and genome-wide significant bivariate GWAS results of broad depression with outcomes serving as negative controls: 1) age-related macular degeneration; 2) osteoporosis measured as bone mineral density of (i) femoral neck; (ii) lumbar spine and; (iii) forearm; 3) cancer of (i) breast and; (ii) prostate.

| SNP                                                                                                      | Chr | Position  | Bivariate GWAS results |    |                        |
|----------------------------------------------------------------------------------------------------------|-----|-----------|------------------------|----|------------------------|
|                                                                                                          |     |           | A1                     | A2 | Bivariate P-value      |
| Age-related macular degeneration <sup>1</sup> & broad depression <sup>2</sup> ( $r_g=0.104$ , $p=0.37$ ) |     |           |                        |    |                        |
| rs17651057                                                                                               | 10  | 124531450 | G                      | A  | $2.72 \times 10^{-8}$  |
| Osteoporosis (bone mineral density)                                                                      |     |           |                        |    |                        |
| (i) Femoral Neck <sup>3</sup> & broad depression <sup>2</sup> ( $r_g=-0.013$ , $p=0.96$ )                |     |           |                        |    |                        |
| (ii) Lumbar Spine <sup>3</sup> & broad depression <sup>2</sup> ( $r_g=-0.070$ , $p=0.33$ )               |     |           |                        |    |                        |
| (iii) Forearm <sup>3</sup> & broad depression <sup>2</sup> ( $r_g=-0.031$ , $p=0.92$ )                   |     |           |                        |    |                        |
| rs7714851                                                                                                | 5   | 164475774 | T                      | C  | $1.29 \times 10^{-10}$ |
| rs1483582                                                                                                | 8   | 116480753 | G                      | A  | $2.67 \times 10^{-8}$  |
| Breast cancer UKB & broad depression <sup>2</sup> ( $r_g=0.10$ , $p=0.10$ )                              |     |           |                        |    |                        |
| rs11208611                                                                                               | 1   | 65684425  | C                      | T  | $4.22 \times 10^{-8}$  |
| rs10888582                                                                                               | 1   | 150428819 | G                      | A  | $4.16 \times 10^{-9}$  |
| Prostate cancer UKB & broad depression <sup>2</sup> ( $r_g=0.054$ , $p=0.93$ )                           |     |           |                        |    |                        |
| rs12477089                                                                                               | 2   | 242265313 | C                      | A  | $1.52 \times 10^{-9}$  |
| rs2439644                                                                                                | 8   | 96226764  | C                      | T  | $7.01 \times 10^{-9}$  |

**Abbreviations:**  $r_g$ : genetic correlation

**Source of data:** UKB: UK biobank data

[https://docs.google.com/spreadsheets/d/1b3oGI2IUt57BcuHttWaZotQcI0-mBRPyZihz87Ms\\_No/edit#gid=1209628142](https://docs.google.com/spreadsheets/d/1b3oGI2IUt57BcuHttWaZotQcI0-mBRPyZihz87Ms_No/edit#gid=1209628142)

## Reference

1. Fritsche LG, Igl W, Bailey JN, Grassmann F, Sengupta S, Bragg-Gresham JL *et al.* A large genome-wide association study of age-related macular degeneration highlights contributions of rare and common variants. *Nat Genet* 2016; **48**(2): 134-143.
2. Direk N, Williams S, Smith JA, Ripke S, Air T, Amare AT *et al.* An Analysis of Two Genome-wide Association Meta-analyses Identifies a New Locus for Broad Depression Phenotype. *Biol Psychiatry* 2017; **82**(5): 322-329.
3. Zheng HF, Forgetta V, Hsu YH, Estrada K, Rosello-Diez A, Leo PJ *et al.* Whole-genome sequencing identifies EN1 as a determinant of bone density and fracture. *Nature* 2015; **526**(7571): 112-117.
