# Supplementary material for: Bivariate genome-wide association analyses of the broad depression phenotype combined with major depressive disorder, bipolar disorder or schizophrenia reveal eight novel genetic loci for depression
Source: PubMed Central journal article supplement (PMC7303007; doi:10.1038/s41380-018-0336-6), 2019-01-09
Supplement: 41380_2018_336_MOESM6_ESM.pdf [file 41380_2018_336_MOESM6_ESM.pdf]

**Supplementary Table 4:** eQTL analysis results for all 56 gSNPs. Genes with eQTLs in multiple databases in bold.

| SNP         | CHR | BP        | Allele | eQTL lookup in three databases   |                                         |                                                                                            |
|-------------|-----|-----------|--------|----------------------------------|-----------------------------------------|--------------------------------------------------------------------------------------------|
|             |     |           |        | Westra et al,<br>FDR<0.05        | BRAINEAC,<br>p<1×10 <sup>-5</sup>       | GTE <sub>x</sub> ,<br>FDR<0.05                                                             |
| rs301806    | 1   | 8482078   | C/T    | <b>RERE</b>                      | <b>RERE</b>                             |                                                                                            |
| rs1432639   | 1   | 72813218  | C/A    |                                  |                                         | <i>NEGR1, RPL31P12</i>                                                                     |
| rs9427672   | 1   | 197754741 | A/G    |                                  | <i>DENND1B</i>                          |                                                                                            |
| rs2535629   | 3   | 52833219  | G/A    | <b>ITIH4, SPCS1</b>              | <b>ITIH4,GNL3, GLT8D1,<br/>SNORD19B</b> | <b>ITIH4, GNL3, PPM1M</b>                                                                  |
| rs7430565   | 3   | 158107180 | G/A    |                                  | <i>RARRES1, MLF1</i>                    |                                                                                            |
| rs34215985  | 4   | 42047778  | C/G    |                                  |                                         | <i>SLC30A9</i>                                                                             |
| rs10514299  | 5   | 87663610  | C/T    |                                  |                                         | <i>TMEM161B-AS1</i>                                                                        |
| rs454214    | 5   | 88003403  | C/T    | <i>MEF2C</i>                     |                                         | <i>CTC-467M3.3</i>                                                                         |
| rs911186    | 6   | 27150599  | A/G    | <b>HIST1H2BK, PRSS16</b>         | <i>ZNF389,<br/>BTN2A1,BTN2A2</i>        | <i>ZNF204P, PRSS16</i>                                                                     |
| rs115507122 | 6   | 30737591  | G/C    |                                  | <i>VAR2, MICB</i>                       | <b>MICB, ATAT1, FLOT1</b>                                                                  |
| rs9368649   | 6   | 30938883  | A/G    | <i>VARSL</i>                     |                                         |                                                                                            |
| rs1265099   | 6   | 31105413  | A/G    | <i>HCG27</i>                     | <i>PSORS1C2</i>                         | <i>C4A</i>                                                                                 |
| rs389883    | 6   | 31947460  | G/T    | <b>SKIV2L, HSPA1B,<br/>DOM3Z</b> | <i>NFKBIL1</i>                          | <i>HLA-DRB1, HLA-DRB5,<br/>CYP21A1P, SKIV2L,<br/>HLA-C, WASF5P,<br/>XXbac-BPG248L24.12</i> |
| rs1475120   | 6   | 105389953 | G/A    |                                  |                                         | <i>LINC00577</i>                                                                           |
| rs7029033   | 9   | 126682068 | C/T    |                                  | <i>LHX2</i>                             |                                                                                            |
| rs12552     | 13  | 53625781  | A/G    | <i>OLFM4</i>                     |                                         |                                                                                            |
| rs4904738   | 14  | 42179732  | T/C    |                                  | <b>LRFN5</b>                            | <b>LRFN5</b>                                                                               |

|            |    |           |     |                                            |                        |              |
|------------|----|-----------|-----|--------------------------------------------|------------------------|--------------|
| rs2182139  | 14 | 60149233  | T/C | <i>RTN1, C14orf100</i>                     |                        |              |
| rs915057   | 14 | 64686207  | A/G |                                            | <i>SYNE2</i>           |              |
| rs4906335  | 14 | 104021141 | C/A | <i>BAG5, CKB, EIF5, XRCC3, KLC1</i>        | <i>KLC1, C14orf153</i> | <i>XRCC3</i> |
| rs11643192 | 16 | 72214276  | C/A | <i>HP</i>                                  |                        |              |
| rs1833288  | 18 | 52517906  | A/G |                                            | <i>RAB27B</i>          |              |
| rs2179744  | 22 | 41621714  | G/A | <i>EP300, L3MBTL2, CHADL, TEF, RANGAP1</i> | <i>XPNPEP3</i>         |              |
