# Supplementary material for: Bivariate genome-wide association analyses of the broad depression phenotype combined with major depressive disorder, bipolar disorder or schizophrenia reveal eight novel genetic loci for depression
Source: PubMed Central journal article supplement (PMC7303007; doi:10.1038/s41380-018-0336-6), 2019-01-09
Supplement: 41380_2018_336_MOESM7_ESM.pdf [file 41380_2018_336_MOESM7_ESM.pdf]

**Supplementary Table 5:** *In silico* pleiotropy analysis findings that show traits significantly associated with SNPs linked ( $r^2 > 0.50$ ) to the 13 gSNPs

| gSNP             | Linked-SNP             | CHR | BP        | A1 | A2 | LD ( $r^2$ ) | Type       | Nearby gene             | Pleiotropic effect           |
|------------------|------------------------|-----|-----------|----|----|--------------|------------|-------------------------|------------------------------|
| <b>rs2422320</b> | rs35998080             | 1   | 73278615  | G  | T  | 1            | intergenic | <i>NEGR1, LINC01360</i> | SCZ, ASD                     |
| <b>rs7597593</b> | rs7597593              | 2   | 185533580 | T  | C  | 1            | intronic   | <i>ZNF804A</i>          | ASD, ADHD, BPD, MDD, and SCZ |
|                  | rs2535629              | 3   | 52833219  | G  | A  | 1            | intronic   | <i>ITIH3</i>            | ASD, ADHD, BPD, MDD, and SCZ |
|                  | rs2240920              | 3   | 52831009  | C  | T  | 0.92         | intronic   | <i>ITIH3</i>            | BMI                          |
|                  | rs736408               | 3   | 52835354  | C  | T  | 0.89         | intronic   | <i>ITIH3</i>            | BPD                          |
|                  | rs4687552              | 3   | 52838402  | T  | C  | 0.89         | intronic   | <i>ITIH3</i>            | SCZ                          |
|                  | rs1042779 <sup>¥</sup> | 3   | 52821011  | A  | G  | 0.84         | exonic     | <i>ITIH1</i>            | BPD                          |
| <b>rs2535629</b> | rs2300149              | 3   | 52822921  | C  | T  | 0.8          | intronic   | <i>ITIH1</i>            | WCadjBMI                     |
|                  | rs2251219*             | 3   | 52584787  | T  | C  | 0.76         | exonic     | <i>PBRM1</i>            | MDD, BPD                     |
|                  | rs11177 <sup>¥</sup>   | 3   | 52721305  | G  | A  | 0.75         | exonic     | <i>GNL3</i>             | Osteoarthritis               |
|                  | rs11130319             | 3   | 52755592  | A  | T  | 0.75         | intronic   | <i>NEK4</i>             | BMI                          |
|                  | rs10865974             | 3   | 52718280  | G  | T  | 0.73         | intronic   | <i>PBRM1</i>            | BPD                          |
|                  | rs2240919              | 3   | 52831701  | C  | G  | 0.72         | intronic   | <i>ITIH3</i>            | Height                       |
|                  | rs3617 <sup>¥</sup>    | 3   | 52833805  | C  | A  | 0.64         | exonic     | <i>ITIH3</i>            | ASD, SCZ, RBC count          |

|                  |            |   |          |   |   |      |            |                             |                                            |
|------------------|------------|---|----------|---|---|------|------------|-----------------------------|--------------------------------------------|
|                  | rs2535627  | 3 | 52845105 | T | C | 0.62 | intergenic | <i>ITIH3,ITIH4</i>          | SCZ                                        |
|                  | rs2710323  | 3 | 52815905 | T | C | 0.58 | intronic   | <i>ITIH1</i>                | BMI, Glaucoma, SCZ, schizoaffective or BPD |
|                  | rs2577831  | 3 | 52628056 | C | A | 0.57 | intronic   | <i>PBRM1</i>                | SCZ                                        |
|                  | rs2302417  | 3 | 52814256 | T | A | 0.56 | intronic   | <i>ITIH1</i>                | BPD                                        |
|                  | rs2590838  | 3 | 52622086 | G | A | 0.55 | intronic   | <i>PBRM1</i>                | Adiponectin levels                         |
|                  | rs7618915  | 3 | 52279594 | G | A | 0.54 | upstream   | <i>PPM1M</i>                | BPD                                        |
|                  | rs13083798 | 3 | 52649748 | A | G | 0.54 | intronic   | <i>PBRM1</i>                | WHR                                        |
|                  | rs1108842  | 3 | 52720080 | A | C | 0.54 | UTR5       | <i>GNL3</i>                 | Adiponectin levels                         |
|                  | rs2239547  | 3 | 52855229 | T | C | 0.54 | intronic   | <i>ITIH4</i>                | SCZ                                        |
| <b>rs1966136</b> | rs2365389  | 3 | 61236462 | C | T | 0.66 | intronic   | <i>FHIT</i>                 | BMI                                        |
|                  | rs911186   | 6 | 27150599 | A | G | 1    | intergenic | <i>MIR3143</i>              | ASD,SCZ                                    |
|                  | rs2393911  | 6 | 27057079 | C | T | 0.72 | intergenic | <i>LINC00240, HIST1H2BJ</i> | Neuroticism                                |
| <b>rs911186</b>  | rs6904071  | 6 | 27047256 | G | A | 0.7  | intergenic | <i>HIST1H2BJ</i>            | Neuroticism                                |
|                  | rs13194053 | 6 | 27143883 | T | C | 0.7  | intergenic | <i>MIR3143, PRSS16</i>      | SCZ                                        |
|                  | rs6932590  | 6 | 27248931 | T | C | 0.52 | intergenic | <i>PRSS16, POM121L2</i>     | SCZ                                        |
| <b>rs9368649</b> | rs9368649  | 6 | 30938883 | A | G | 1    | intergenic | <i>DPCRI, MUC21</i>         | Pulmonary function                         |

|                  |            |    |           |   |   |      |            |                          |                                       |
|------------------|------------|----|-----------|---|---|------|------------|--------------------------|---------------------------------------|
| <b>rs389883</b>  | rs622871   | 6  | 31878495  | A | G | 0.81 | intronic   | <i>C2</i>                | SIA, IMBadjBS, UTI                    |
|                  | rs521977   | 6  | 31836827  | T | G | 0.6  | intronic   | <i>SLC44A4</i>           | IMBadjBS, PUM                         |
|                  | rs644045   | 6  | 31883957  | A | G | 0.58 | intronic   | <i>C2</i>                | Endometriosis                         |
|                  | rs589428   | 6  | 31848220  | T | G | 0.57 | intronic   | <i>EHMT2</i>             | WHRadjBMIns                           |
|                  | rs1313996  | 6  | 31876042  | T | A | 0.57 | intronic   | <i>C2</i>                | Shingles                              |
|                  | rs2763981  | 6  | 31840021  | T | A | 0.54 | intronic   | <i>SLC44A4</i>           | TIBC                                  |
| <b>rs2182139</b> | rs12431410 | 14 | 60166022  | C | T | 0.6  | intronic   | <i>RTN1</i>              | SCZ                                   |
| <b>rs915057</b>  | rs1152591  | 14 | 64680848  | A | G | 0.7  | intronic   | <i>SYNE2</i>             | Atrial fibrillation                   |
|                  | rs1256061  | 14 | 64703593  | G | T | 0.59 | intronic   | <i>ESR2</i>              | Hb concentration,RBC count,Hematocrit |
| <b>rs4906335</b> | rs12887734 | 14 | 104046834 | G | T | 0.92 | intronic   | <i>APOPT1</i>            | SCZ                                   |
|                  | rs12893668 | 14 | 104017793 | G | A | 0.78 | intergenic | <i>BAG5</i>              | Reticulocyte count                    |
|                  | rs2765041  | 14 | 103991478 | T | A | 0.61 | intergenic | <i>CKB</i>               | High light scatter reticulocyte count |
| <b>rs9951150</b> | rs9951150  | 18 | 52821124  | A | G | 1    | intergenic | <i>LOC101927229,TCF4</i> | ASD,ADHD, BPD, MDD, and SCZ           |

¥ Nonsynonymous SNP, \*synonymous SNP, gSNPs; genome-wide significant lead SNPs identified in our analyses. Abbreviations: SNP: single nucleotide polymorphism, LD: linkage disequilibrium, MDD: major depressive disorder, BPD: bipolar disorder, SCZ: schizophrenia, ASD: autism spectrum disorder, ADHD: attention deficit hyperactivity disorder, BMI: body mass index, WCadjBMI(ns): Waist circumference adjusted for body mass index (in non-smokers), RBC: red blood cell, Hb: Hemoglobin, SIA: Sulfasalazine-induced agranulocytosis, IMBadjBS: Itch intensity from mosquito bite adjusted by bite size, UTI: Urinary tract infection frequency, PUM: Perceived unattractiveness to mosquitoes, TIBC: total iron binding capacity.
